# Supplementary material
Source: Springer Nature journal article supplement (https://www.springermedizin.de/resource/supplementary/12889_2013_6148_MOESM5_ESM.pdf/9494318)
Supplement: MOESM5 [file 9494318]

## MAJOR CONTENT AREAS

## CATEGORIES

Enabling policy environment and networks

Implementing a supportive national structure  
Strong voluntarism aimed for increased institutionalization  
The ups and downs of innersectorial coordination

Protocols and guidelines steering the health sector response

Participatory development of guidelines  
Clinical work: not just following the steps of the protocol

Training of health professionals

Spreading a network of sensitized professionals  
Progress made and current uncertain sustainability

Accountability and monitoring

Weakenesses of existing systems: design, application and data utilization

Prevention and promotion

Supposedly a priority but not prioritized in practice
